# Supplementary figures and images for: Novel Components of the Toxoplasma Inner Membrane Complex Revealed by BioID
Source: PubMed Central journal article supplement — mBio. 2015 Feb 17;6(1):e02357-14. doi: 10.1128/mBio.02357-14 (PMC4337574; doi:10.1128/mbio.02357-14), 2015-02-17

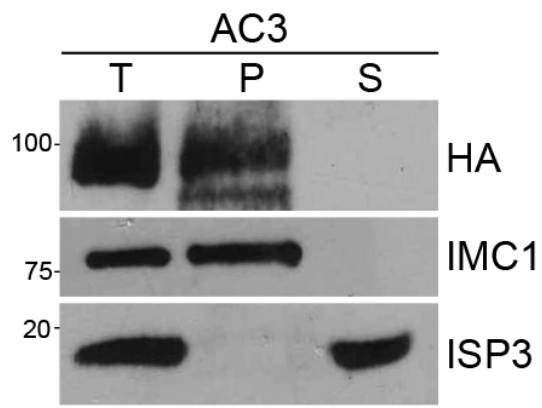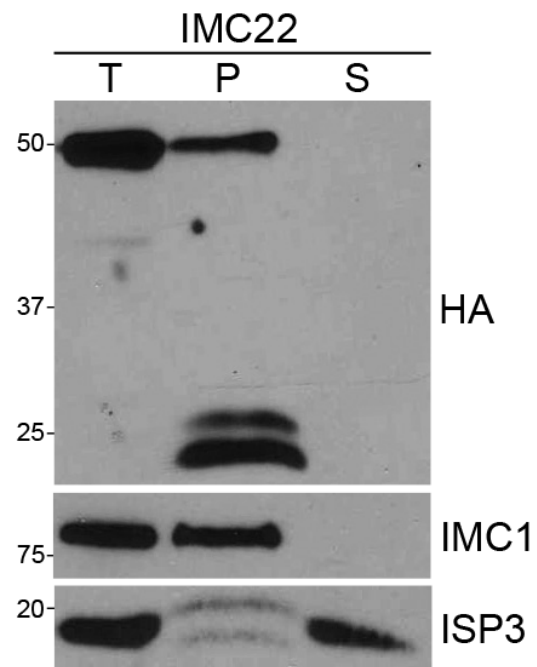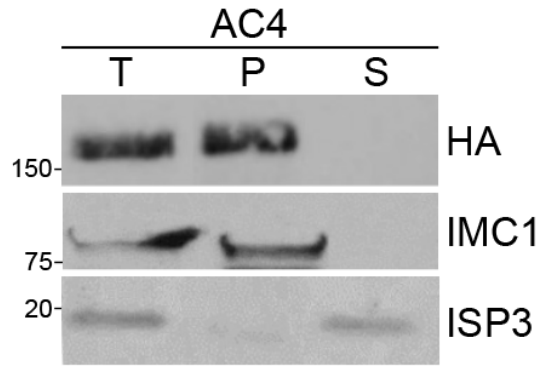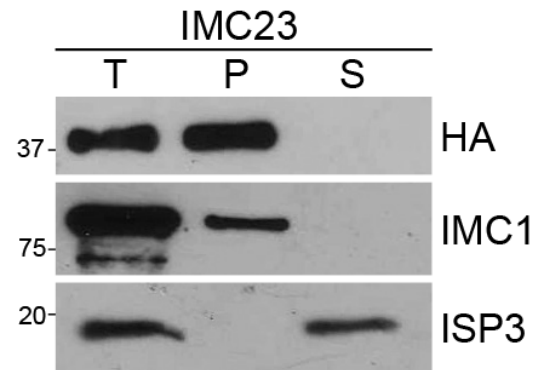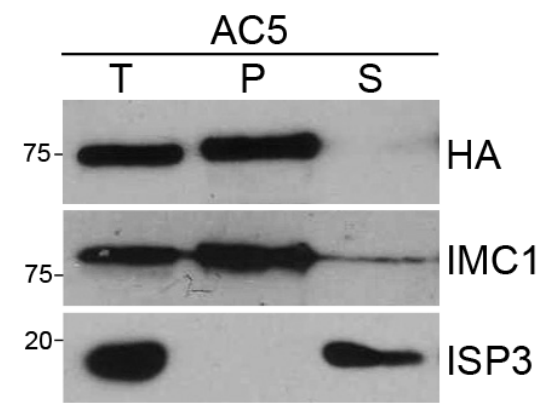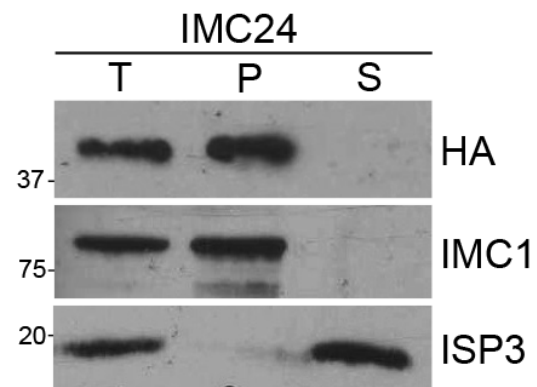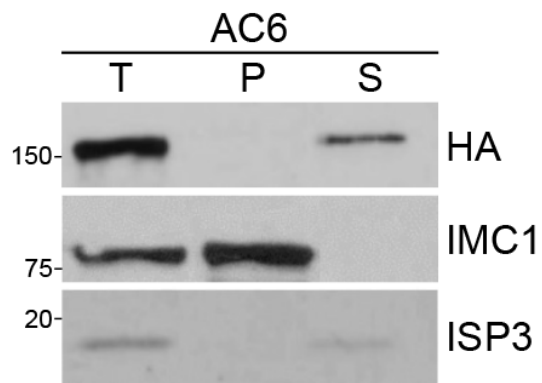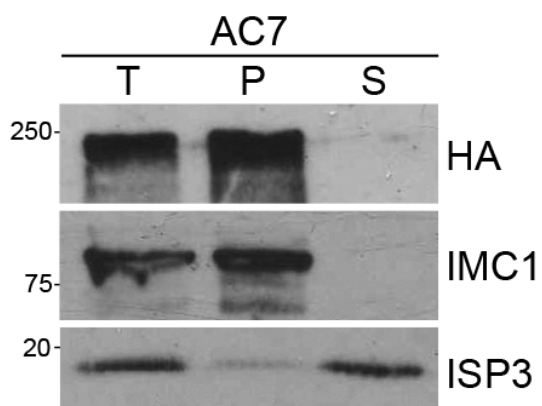

Supplement: mbo001152163sf5.pdf [file mbo001152163sf5.pdf]

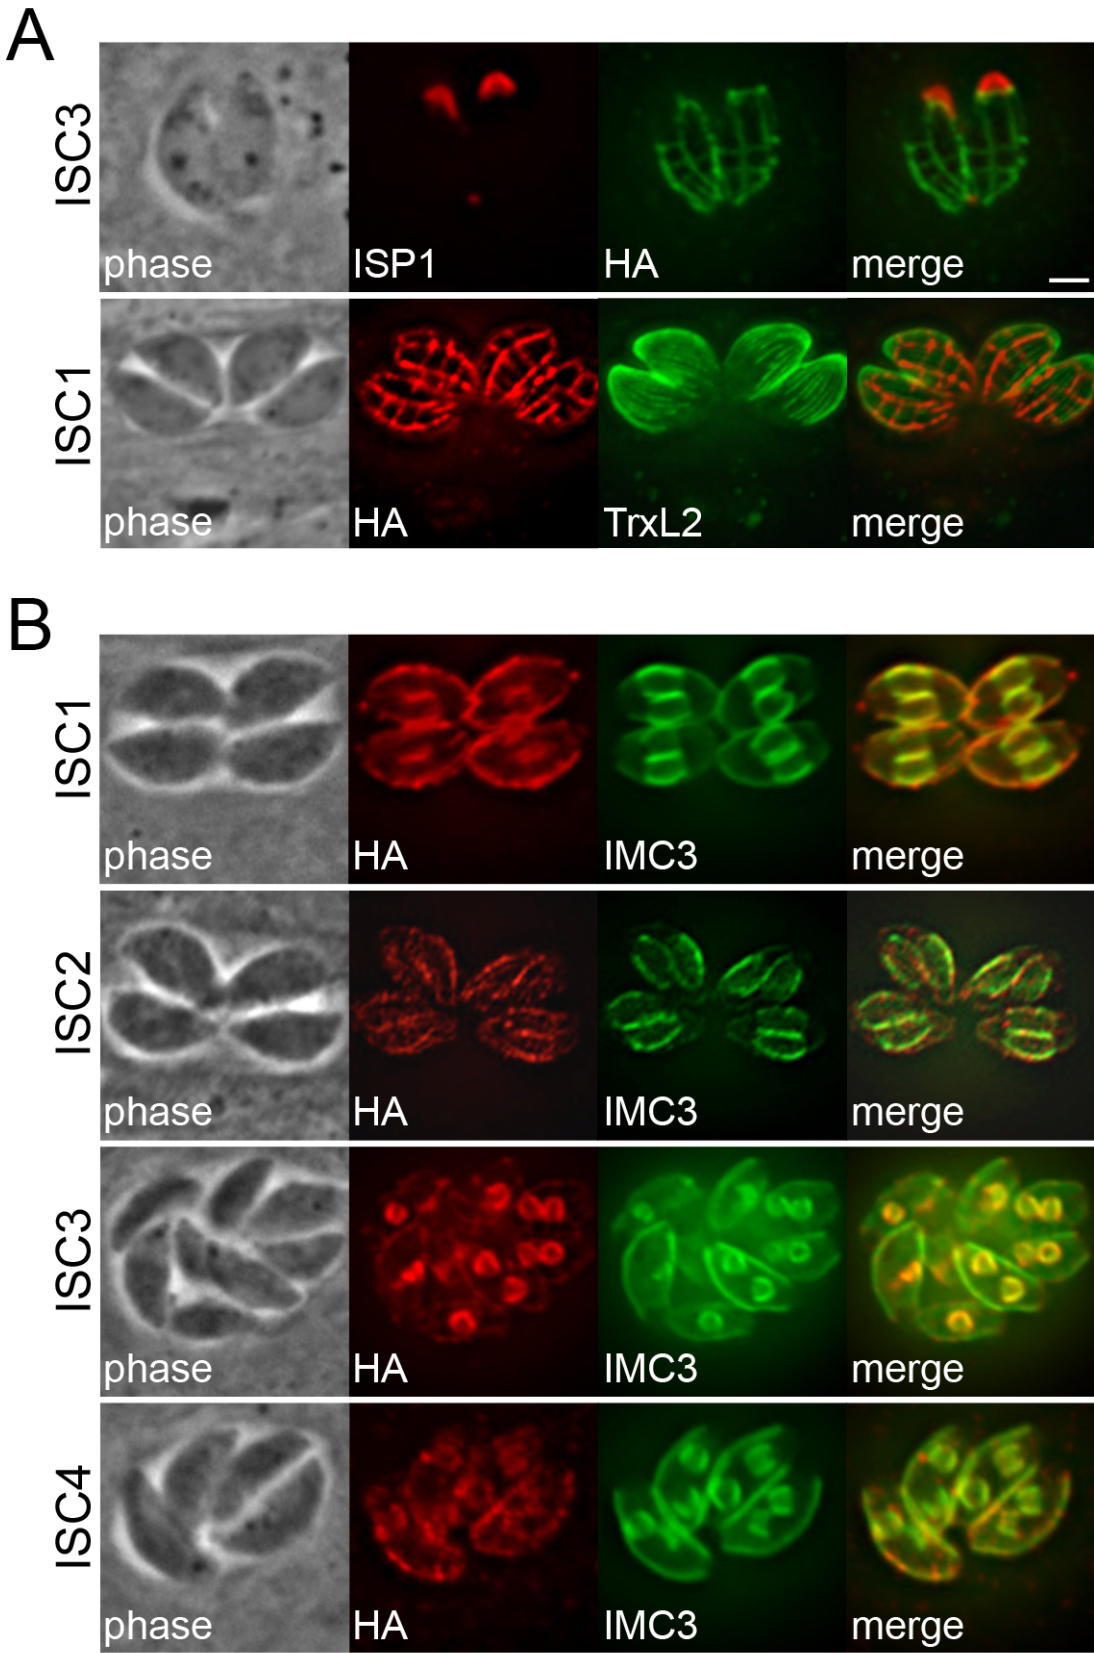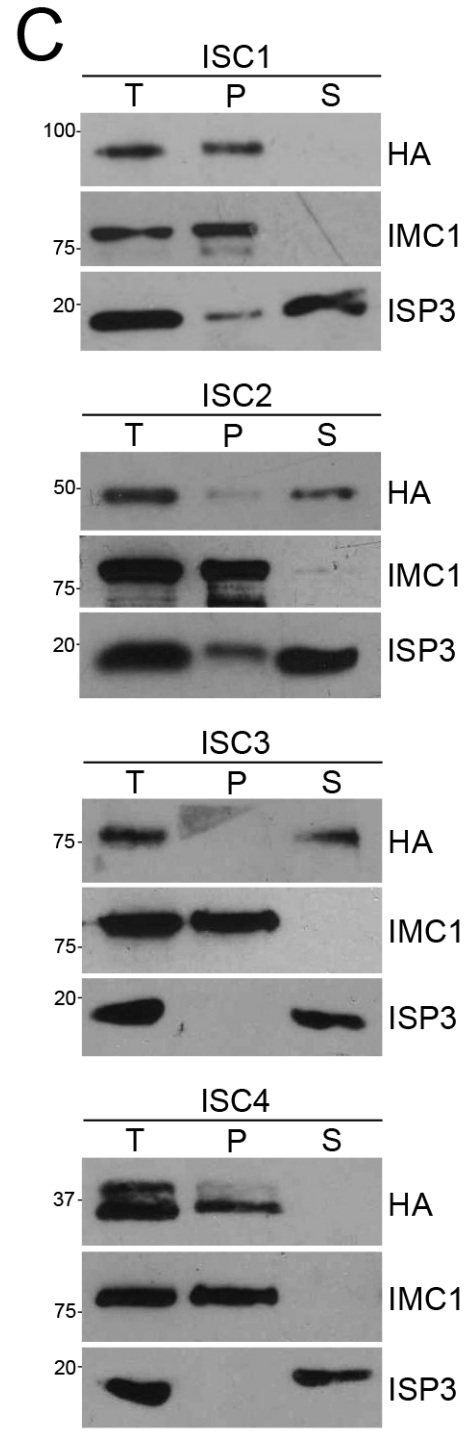

Supplement: mbo001152163sf6.pdf [file mbo001152163sf6.pdf]
